# Supplementary material
Source: publisher site journal article supplement (https://www.spandidos-publications.com/1869/downloadSupplementary)
Supplement: Supplementary file 1 [file downloadSupplementary]

Table SI. Pairwise comparisons of tumor Breslow thickness categories (sex- and age-matched dataset, n=278).

|                             |                       | Patients with metastases |                      |                  |                      |                  |                      |                  |                      |
|-----------------------------|-----------------------|--------------------------|----------------------|------------------|----------------------|------------------|----------------------|------------------|----------------------|
|                             |                       | ≤1.0                     |                      | 1.0-2.0          |                      | 2.0-4.0          |                      | >4.0             |                      |
|                             | Breslow thickness, mm | OR (95% CI)              | P-value <sup>a</sup> | OR (95% CI)      | P-value <sup>a</sup> | OR (95% CI)      | P-value <sup>a</sup> | OR (95% CI)      | P-value <sup>a</sup> |
| Patients without metastases | ≤1.0                  |                          |                      | 0.47 (0.26-0.89) | 0.0217               | 1.12 (0.66-1.92) | 0.684                | 1.39 (0.84-2.29) | 0.206                |
|                             | 1.0-2.0               |                          |                      |                  |                      | 2.34 (1.25-4.38) | 0.009                | 2.90 (1.60-5.26) | <0.001               |
|                             | 2.0-4.0               |                          |                      |                  |                      |                  |                      | 1.24 (0.75-2.05) | 0.440                |
|                             | >4.0                  |                          |                      |                  |                      |                  |                      |                  |                      |

<sup>a</sup>P-values were obtained by Fisher's exact test. OR, odds ratio; CI, confidence interval.

Table SII. Univariate analysis of risk factors for melanoma metastases. Individuals with metastases (n=309) were matched only by the year of initial diagnosis and follow-up time.

| Risk factor                         | Patients with metastases |       | Patients without metastases |       | OR (95% CI)      | P-value <sup>a</sup> |
|-------------------------------------|--------------------------|-------|-----------------------------|-------|------------------|----------------------|
|                                     | N                        | %     | N                           | %     |                  |                      |
| Sex                                 |                          |       |                             |       |                  |                      |
| Female                              | 175                      | 56.6  | 206                         | 66.7  | 1.53 (1.10-2.12) | 0.013                |
| Male                                | 134                      | 43.4  | 103                         | 33.3  |                  |                      |
| Total <sup>c</sup>                  | 309                      | 100.0 | 309                         | 100.0 |                  |                      |
| Age, years                          |                          |       |                             |       |                  |                      |
| Mean ± SD                           | 61.5±14.7                |       | 61.4±15.5                   |       |                  | 0.907 <sup>b</sup>   |
| Median                              | 63.3                     |       | 62.8                        |       |                  |                      |
| ≤40                                 | 30                       | 9.8   | 37                          | 12.1  |                  | 0.541                |
| 41-60                               | 101                      | 33.0  | 102                         | 33.3  |                  |                      |
| 61-80                               | 154                      | 50.3  | 140                         | 45.8  |                  |                      |
| >80                                 | 21                       | 6.9   | 27                          | 8.8   |                  |                      |
| Total <sup>c</sup>                  | 306                      | 100.0 | 306                         | 100.0 |                  |                      |
| Tumor localization                  |                          |       |                             |       |                  |                      |
| Head and neck                       | 31                       | 10.4  | 45                          | 15.1  |                  | 0.034                |
| Limbs                               | 117                      | 39.1  | 129                         | 43.1  |                  |                      |
| Trunk                               | 127                      | 42.5  | 114                         | 38.1  |                  |                      |
| Hands and feet <sup>d</sup>         | 24                       | 8.0   | 11                          | 3.7   |                  |                      |
| Total <sup>c</sup>                  | 299                      | 100.0 | 299                         | 100.0 |                  |                      |
| CM subtype                          |                          |       |                             |       |                  |                      |
| Superficial spreading melanoma      | 18                       | 19.8  | 15                          | 16.5  |                  | 0.265 <sup>c</sup>   |
| Nodular melanoma                    | 73                       | 80.2  | 73                          | 80.2  |                  |                      |
| Lentigo maligna melanoma            | 0                        | 0.0   | 3                           | 3.3   |                  |                      |
| Total <sup>c</sup>                  | 91                       | 100.0 | 91                          | 100.0 |                  |                      |
| Breslow thickness, mm               |                          |       |                             |       |                  |                      |
| Mean ± SD                           | 5.28±6.1                 |       | 3.74±4.5                    |       |                  | <0.001 <sup>b</sup>  |
| Median                              | 4.0                      |       | 2.0                         |       |                  |                      |
| ≤1.0                                | 51                       | 22.5  | 66                          | 29.1  |                  | 0.001                |
| 1.0-2.0                             | 27                       | 11.9  | 49                          | 21.6  |                  |                      |
| 2.0-4.0                             | 55                       | 24.2  | 51                          | 22.4  |                  |                      |
| >4.0                                | 94                       | 41.4  | 61                          | 26.9  |                  |                      |
| Total <sup>c</sup>                  | 227                      | 100.0 | 227                         | 100.0 |                  |                      |
| Ulceration                          |                          |       |                             |       |                  |                      |
| Absent                              | 65                       | 38.7  | 73                          | 43.5  | 1.22 (0.79-1.88) | 0.438                |
| Present                             | 103                      | 61.3  | 95                          | 56.5  |                  |                      |
| Total <sup>c</sup>                  | 168                      | 100.0 | 168                         | 100.0 |                  |                      |
| Pigment                             |                          |       |                             |       |                  |                      |
| Present                             | 211                      | 87.2  | 213                         | 88.0  | 1.08 (0.63-1.85) | 0.890                |
| Absent                              | 31                       | 12.8  | 29                          | 12.0  |                  |                      |
| Total <sup>c</sup>                  | 242                      | 100.0 | 242                         | 100.0 |                  |                      |
| Predominant cell type in the lesion |                          |       |                             |       |                  |                      |
| Epithelial                          | 132                      | 67.4  | 125                         | 63.8  |                  | 0.293                |
| Spindle                             | 24                       | 12.2  | 35                          | 17.8  |                  |                      |
| Mixed                               | 40                       | 20.4  | 36                          | 18.4  |                  |                      |
| Total <sup>c</sup>                  | 196                      | 100.0 | 196                         | 100.0 |                  |                      |
| BMI                                 |                          |       |                             |       |                  |                      |
| Mean ± SD                           | 28.8±5.4                 |       | 29.0±6.2                    |       |                  | 0.939 <sup>b</sup>   |
| Median                              | 27.9                     |       | 27.9                        |       |                  |                      |
| 18.61-25.00                         | 40                       | 24.0  | 46                          | 27.6  |                  | 0.706                |
| 25.01-30.00                         | 68                       | 40.7  | 62                          | 37.1  |                  |                      |
| >30.01                              | 59                       | 35.3  | 59                          | 35.3  |                  |                      |
| Total <sup>c</sup>                  | 167                      | 100.0 | 167                         | 100.0 |                  |                      |

<sup>a</sup>P-values were obtained by the  $\chi^2$  test unless indicated otherwise. <sup>b</sup>Mann-Whitney test. <sup>c</sup>Fisher's exact test. <sup>d</sup>Acral lentiginous melanomas were excluded before analyses. <sup>e</sup>The number of matched cases in each group; if there was missing information for an individual in one of the groups, the corresponding case-control pair was excluded from the analysis. OR and 95% CI are presented for predictors with two categories. OR, odds ratio; CI, confidence interval.

Table SIII. Differences between melanoma risk factors for female and male patients (sex- and age-matched dataset, n=278).

| Risk factor                         | With metastases |       |           |       | OR (95% CI)      | P-value <sup>a</sup> | Without metastases |       |           |       | OR (95% CI)      | P-value <sup>a</sup> |
|-------------------------------------|-----------------|-------|-----------|-------|------------------|----------------------|--------------------|-------|-----------|-------|------------------|----------------------|
|                                     | Female          |       | Male      |       |                  |                      | Female             |       | Male      |       |                  |                      |
|                                     | N               | %     | N         | %     |                  |                      | N                  | %     | N         | %     |                  |                      |
| Tumor localization                  |                 |       |           |       |                  |                      |                    |       |           |       |                  |                      |
| Head and neck                       | 15              | 9.1   | 13        | 11.4  |                  | 0.010                | 25                 | 15.3  | 16        | 14.0  |                  | 0.003                |
| Limbs                               | 80              | 48.8  | 33        | 29.0  |                  |                      | 75                 | 45.7  | 29        | 25.5  |                  |                      |
| Trunk                               | 58              | 35.4  | 59        | 51.7  |                  |                      | 55                 | 33.5  | 60        | 52.6  |                  |                      |
| Hands and feet <sup>d</sup>         | 11              | 6.7   | 9         | 7.9   |                  |                      | 9                  | 5.5   | 9         | 7.9   |                  |                      |
| Total <sup>e</sup>                  | 164             | 100.0 | 114       | 100.0 |                  |                      | 164                | 100.0 | 114       | 100.0 |                  |                      |
| CM subtype                          |                 |       |           |       |                  |                      |                    |       |           |       |                  |                      |
| Superficial spreading melanoma      | 10              | 21.7  | 5         | 19.2  |                  | 1.000 <sup>c</sup>   | 5                  | 10.9  | 3         | 11.5  |                  | 0.462 <sup>c</sup>   |
| Nodular melanoma                    | 35              | 76.1  | 20        | 76.9  |                  |                      | 37                 | 80.4  | 23        | 88.5  |                  |                      |
| Lentigo maligna                     | 1               | 2.2   | 1         | 3.9   |                  |                      | 4                  | 8.7   | 0         | 0.0   |                  |                      |
| Total <sup>e</sup>                  | 46              | 100.0 | 26        | 100.0 |                  |                      | 46                 | 100.0 | 26        | 100.0 |                  |                      |
| Breslow thickness, mm               |                 |       |           |       |                  |                      |                    |       |           |       |                  |                      |
| Mean ± SD                           | 5.52±6.53       |       | 4.52±4.77 |       |                  | 0.214 <sup>b</sup>   | 4.13±5.49          |       | 4.24±4.05 |       |                  | 0.182 <sup>b</sup>   |
| Median                              | 4.0             |       | 3.0       |       |                  |                      | 2.0                |       | 3.0       |       |                  |                      |
| ≤1.0                                | 32              | 24.8  | 22        | 25.6  |                  | 0.257                | 32                 | 24.8  | 23        | 26.7  |                  | 0.359                |
| 1.0-2.0                             | 11              | 8.5   | 12        | 13.9  |                  |                      | 34                 | 26.4  | 15        | 17.5  |                  |                      |
| 2.0-4.0                             | 30              | 23.3  | 25        | 29.1  |                  |                      | 26                 | 20.1  | 24        | 27.9  |                  |                      |
| >4.0                                | 56              | 43.4  | 27        | 31.4  |                  |                      | 37                 | 28.7  | 24        | 27.9  |                  |                      |
| Total <sup>e</sup>                  | 129             | 100.0 | 86        | 100.0 |                  |                      | 129                | 100.0 | 86        | 100.0 |                  |                      |
| Ulceration                          |                 |       |           |       |                  |                      |                    |       |           |       |                  |                      |
| Absent                              | 31              | 32.0  | 30        | 46.9  | Reference        |                      | 47                 | 48.5  | 34        | 53.1  | Reference        |                      |
|                                     |                 |       |           |       | 0.53 (0.28-1.02) |                      |                    |       |           |       | 0.83 (0.44-1.56) |                      |
| Present                             | 66              | 68.0  | 34        | 53.1  |                  | 0.081                | 50                 | 51.5  | 30        | 46.9  |                  | 0.675                |
| Total <sup>e</sup>                  | 97              | 100.0 | 64        | 100.0 |                  |                      | 100.0              | 64    | 100.0     | 97    |                  |                      |
| Pigment                             |                 |       |           |       |                  |                      |                    |       |           |       |                  |                      |
| Present                             | 112             | 85.5  | 83        | 90.2  | Reference        |                      | 125                | 95.4  | 84        | 91.3  | Reference        |                      |
|                                     |                 |       |           |       | 0.64 (0.28-1.48) |                      |                    |       |           |       | 1.98 (0.66-5.93) |                      |
| Absent                              | 19              | 14.5  | 9         | 9.8   |                  | 0.314 <sup>c</sup>   | 6                  | 4.6   | 8         | 8.7   |                  | 0.265 <sup>c</sup>   |
| Total <sup>e</sup>                  | 131             | 100.0 | 92        | 100.0 |                  |                      | 131                | 100.0 | 92        | 100.0 |                  |                      |
| Predominant cell type in the lesion |                 |       |           |       |                  |                      |                    |       |           |       |                  |                      |
| Epithelial                          | 64              | 62.7  | 57        | 74.0  |                  | 0.175                | 66                 | 64.7  | 52        | 67.5  |                  | 0.897                |
| Spindle                             | 12              | 11.8  | 9         | 11.7  |                  |                      | 19                 | 18.6  | 14        | 18.2  |                  |                      |
| Mixed                               | 26              | 25.5  | 11        | 14.3  |                  |                      | 17                 | 16.7  | 11        | 14.3  |                  |                      |
| Total <sup>e</sup>                  | 102             | 100.0 | 77        | 100.0 |                  |                      | 102                | 100.0 | 77        | 100.0 |                  |                      |
| BMI                                 |                 |       |           |       |                  |                      |                    |       |           |       |                  |                      |
| Mean ± SD                           | 29.1±6.0        |       | 27.9±4.65 |       |                  | 0.303 <sup>b</sup>   | 28.3±6.39          |       | 28.4±4.93 |       |                  | 0.580 <sup>b</sup>   |
| Median                              | 28.0            |       | 26.8      |       |                  |                      | 27.5               |       | 27.9      |       |                  |                      |
| 18.01-25.00                         | 25              | 28.1  | 15        | 25.4  |                  | 0.160                | 31                 | 34.8  | 13        | 22.0  |                  | 0.174                |
| 25.01-30.00                         | 29              | 32.6  | 28        | 47.5  |                  |                      | 28                 | 31.5  | 26        | 44.1  |                  |                      |
| >30.01                              | 35              | 39.3  | 16        | 27.1  |                  |                      | 30                 | 33.7  | 20        | 33.9  |                  |                      |
| Total <sup>e</sup>                  | 89              | 100.0 | 59        | 100.0 |                  |                      | 89                 | 100.0 | 59        | 100.0 |                  |                      |

<sup>a</sup>P-values were obtained by the  $\chi^2$  test unless indicated otherwise. <sup>b</sup>Mann-Whitney test. <sup>c</sup>Fisher's exact test. <sup>d</sup>Acral lentiginous melanomas were excluded before analyses. <sup>e</sup>The number of matched cases in each group; if there was missing information for an individual in one of the groups, the corresponding case-control pair was excluded from the analysis. OR and 95% CI are presented for predictors with two categories. If a predictor had more than two categories, overall significance of a predictor was evaluated first. If the obtained P-value was significant (e.g., tumor localization), pairwise comparisons were performed, and odds ratios were calculated for combinations of two categories (Table II). OR, odds ratio; CI, confidence interval.

Table SIV. Comparisons of the frequencies of tumor localizations for female and male patients without metastases (sex- and age-matched dataset, n=278).

|                          |                             | Females without metastases |                      |                             |                      |                |                      |                  |                      |
|--------------------------|-----------------------------|----------------------------|----------------------|-----------------------------|----------------------|----------------|----------------------|------------------|----------------------|
|                          |                             | Limbs                      |                      | Hands and feet <sup>b</sup> |                      | Trunk          |                      | Head and neck    |                      |
| Tumor localisation       |                             | OR<br>(95% CI)             | P-value <sup>a</sup> | OR<br>(95% CI)              | P-value <sup>a</sup> | OR<br>(95% CI) | P-value <sup>a</sup> | OR               | P-value <sup>a</sup> |
| Males without metastases | Limbs                       |                            |                      | 2.59                        | 0.095                | 2.82           | <0.001               | 1.66 (0.77-3.54) | 0.232                |
|                          |                             |                            |                      |                             | (0.93-7.16)          | (1.61-4.96)    |                      |                  |                      |
|                          | Hands and feet <sup>b</sup> |                            |                      |                             |                      | 1.09           | 1.000                | 0.64 (0.21-1.96) | 0.569                |
|                          |                             |                            |                      |                             |                      | (0.40-2.95)    |                      |                  |                      |
|                          | Trunk                       |                            |                      |                             |                      |                |                      | 0.70 (0.82-3.52) | 0.202                |
|                          | Head and neck               |                            |                      |                             |                      |                |                      |                  |                      |

<sup>a</sup>P-values were obtained by Fisher's exact test. <sup>b</sup>Acral lentiginous melanomas were excluded before analyses. OR, odds ratio; CI, confidence interval.

Table SV. Comparisons of the frequencies of tumor localizations for female and male patients with metastases (sex- and age-matched dataset, n=278).

|                       |                             | Females with metastases |                      |                             |                      |                  |                      |               |                      |
|-----------------------|-----------------------------|-------------------------|----------------------|-----------------------------|----------------------|------------------|----------------------|---------------|----------------------|
|                       |                             | Limbs                   |                      | Hands and feet <sup>b</sup> |                      | Trunk            |                      | Head and neck |                      |
| Tumor localisation    |                             | OR (95% CI)             | P-value <sup>a</sup> | OR (95% CI)                 | P-value <sup>a</sup> | OR (95% CI)      | P-value <sup>a</sup> | OR (95% CI)   | P-value <sup>a</sup> |
| Males with metastases | Limbs                       |                         |                      |                             |                      |                  |                      |               |                      |
|                       | Hands and feet <sup>b</sup> | 1.98 (0.75-5.23)        | 0.194                |                             |                      |                  |                      |               |                      |
|                       | Trunk                       | 2.47 (1.43-4.25)        | 0.001                | 1.24 (0.48-3.22)            | 0.81                 |                  |                      |               |                      |
|                       | Head and neck               | 2.1 (0.90-4.90)         | 0.114                | 1.06 (0.34-3.35)            | 1.000                | 1.17 (0.51-2.68) | 0.834                |               |                      |

<sup>a</sup>P-values were obtained by Fisher's exact test. <sup>b</sup>Acral lentiginous melanomas were excluded before analyses. OR, odds ratio; CI, confidence interval.
